# Supplementary material for: Rhodotorula toruloides for carotenoid production using waste hardwood biomass
Source: Research Square preprint supplement (doi:10.21203/rs.3.rs-8187172/v1), 2025-12-10
Supplement: Supplementary file 1 [file 8e4106f2d74100ddc5129f81.docx]

**Table S1:** Composition of wood and bark samples, used in this study, determined by GC/MS analyses. Compounds of each class are listed in ascending order of retention time.

| Class | Compound | SOW | SOB | MTW | MTB |
| --- | --- | --- | --- | --- | --- |
| Alchools | Glycerol |  |  | X | X |
| 1-Hexadecanol |  | X |  |  |
| cis-9, 1-Tetradecenol |  | X |  |  |
| Octacosanol |  | X |  | X |
| Alkenes | 3-Tetradecene |  | X |  |  |
| 3-Octadecene |  | X |  |  |
| 3-Eicosene |  | X |  |  |
| Sugar derivatives | Hydroxymethylfurfural |  |  |  | X |
| L-Lyxose |  | X |  |  |
| 1,6-anhydro-  β-D-Glucopyranose |  | X |  | X |
| Fatty acids | Caproic acid |  |  |  | X |
| Enanthic acid |  |  |  | X |
| Capric acid |  |  |  | X |
| Azelaic acid |  |  |  | X |
| Myristic acid |  |  |  | X |
| Pentadecanoic acid |  |  | X | X |
| Palmitic acid |  | X | X | X |
| Margaric Acid |  |  | X | X |
| Linoleic Acid | X | X | X | X |
| Oleic Acid | X | X | X | X |
| Stearic Acid | X | X | X | X |
| Arachidic acid |  |  | X | X |
| Behenic acid |  |  | X | X |
| Erucic acid |  | X |  |  |
| Lignoceric acid |  |  | X | X |
| Sterols | 3β-4,6-Cholestadienol |  | X |  |  |
| β-Sitosterol |  | X | X | X |
| Lanosterol |  |  | X | X |
| Cholest-4-en-3-ol | X | X | X | X |
| Lanosterol acetate |  |  |  | X |
| Campesterol |  |  | X |  |
| Phenolic compounds | Resorcinol |  |  | X | X |
| Syringol |  |  |  | X |
| Hydroquinone |  |  | X |  |
| Catechol |  |  | X | X |
| p-Salicylic acid |  |  | X | X |
| 3,4-Dimethoxyphenol |  |  |  | X |
| o-Xylorcinol |  |  | X |  |
| Protocatechualdehyde |  |  | X |  |
| Antiarol |  |  | X | X |
| β-Resorcylaldehyde |  |  | X |  |
| Coniferyl alcohol |  |  |  | X |
| 2,4-Dihydroxybenzaldehyde |  |  | X |  |
| Hexylresorcinol |  |  | X |  |
| Tyrosine |  |  | X |  |
| Oxyresveratrol |  |  | X |  |
| Benzyl alcohol |  |  | X |  |
| Vitamins | δ-Tocopherol |  |  |  | X |
| γ-Tocopherol |  |  |  | X |
| α-Tocopherol |  |  |  | X |
| Coumarins | Umbelliferone |  |  | X | X |
| Methyl ostruthin |  |  |  | X |
| Ostruthin |  |  |  | X |
| Daphnetin |  |  | X |  |
| Scopoletin |  |  | X | X |
| Esculetin |  |  | X | X |
| Terpenes | Dehydroabietic acid |  |  | X | X |
| Sesquirosefuran |  |  |  | X |
| β-Amyrone |  | X | X | X |
| 24-Norursa-3,12-diene |  | X |  |  |
| Lupeol |  | X |  |  |
| β-Amyrin |  | X | X | X |
| Glutinol |  | X |  |  |
| Copalol |  | X |  |  |
| Simiarenol |  | X |  |  |
| Humulenol-II |  | X |  |  |
| Others | Benzaldehyde |  | X |  |  |
| Benzaldehyde diethylacetal |  | X |  |  |
| δ-Cyclogeraniolene |  |  | X | X |
| Fumaric acid |  |  |  | X |


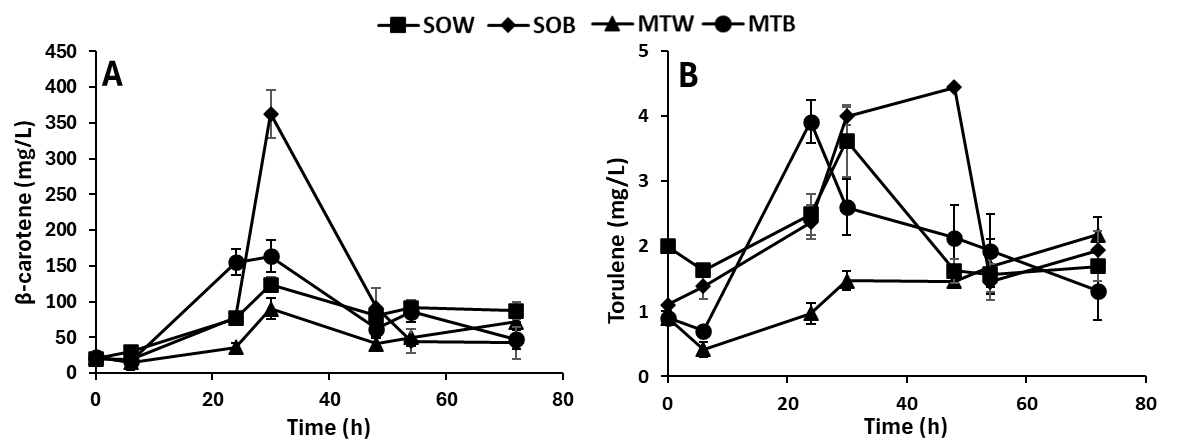


**Figure S1:** Development of (A) β-carotene and (B) torulene production by *R. toruloides* from **SOW**, **SOB**, **MTW**, and **MTB** hydrolysates. Values are the means ± SD of three independent experiments.
